# Supplementary material
Source: publisher figshare collection journal article supplement (https://sage.figshare.com/ndownloader/files/14256350)
Supplement: Supplementary file 1 [file 14256350]

## How and Why the Collaborative Consumption of Food Leads to Overpurchasing, Overconsumption, and Waste

### Web Appendix

**Table 1: Purchase Amounts for Studies 2, 3, 4, and 5**

| <i>Study 2 (picnic sandwiches)</i> |             |                                  |                       |                            |  |
|------------------------------------|-------------|----------------------------------|-----------------------|----------------------------|--|
| <b>Personal Consumption</b>        |             | <b>Collaborative Consumption</b> |                       |                            |  |
|                                    |             | <i>Base</i>                      | <i>Tastes-Certain</i> | <i>Consumption-Certain</i> |  |
| <i>M</i>                           | <b>4.97</b> | <b>16.71</b>                     | <b>18.14</b>          | <b>21.18</b>               |  |
| <i>SD</i>                          | 2.17        | 15.39                            | 17.15                 | 17.79                      |  |

---

| <i>Study 3 (picnic sandwiches)</i> |  |                             |                |                                  |                |
|------------------------------------|--|-----------------------------|----------------|----------------------------------|----------------|
| <b>Message =</b>                   |  | <b>Personal Consumption</b> |                | <b>Collaborative Consumption</b> |                |
|                                    |  | <i>Waste</i>                | <i>Company</i> | <i>Waste</i>                     | <i>Company</i> |
| <i>M</i>                           |  | <b>4.17</b>                 | <b>5.26</b>    | <b>10.84</b>                     | <b>16.11</b>   |
| <i>SD</i>                          |  | 1.44                        | 2.37           | 8.66                             | 11.93          |

---

| <i>Study 4 (picnic sandwiches)</i> |             |                                  |               |               |               |
|------------------------------------|-------------|----------------------------------|---------------|---------------|---------------|
| <b>Personal Consumption</b>        |             | <b>Collaborative Consumption</b> |               |               |               |
|                                    |             | <i>“Give &amp; Take”</i>         | <i>“Take”</i> | <i>“Give”</i> | <i>“Base”</i> |
| <i>M</i>                           | <b>5.89</b> | <b>15.39</b>                     | <b>12.24</b>  | <b>19.19</b>  | <b>20.23</b>  |
| <i>SD</i>                          | 5.58        | 14.17                            | 11.34         | 12.14         | 17.17         |

---

| <i>Study 5 (buffalo-style chicken wings)</i> |  |                             |              |                           |              |
|----------------------------------------------|--|-----------------------------|--------------|---------------------------|--------------|
| <b>Group Size =</b>                          |  | <b>Personal Consumption</b> |              | <b>Collaborative Con.</b> |              |
|                                              |  | <i>Three</i>                | <i>Ten</i>   | <i>Three</i>              | <i>Ten</i>   |
| <i>M</i>                                     |  | <b>12.15</b>                | <b>10.61</b> | <b>13.76</b>              | <b>17.53</b> |
| <i>SD</i>                                    |  | 7.55                        | 6.83         | 6.03                      | 8.84         |

The following tables examine the sensitivity of the results presented in the main document to the inclusion or exclusion of the covariates described in the main text. As the reader will see, the inclusion of covariates only significantly changes the result of the intended-consumption dependent measure in Study 5. All other dependent measures in all other studies are not meaningfully influenced by the inclusion of the covariates.

**Table 2: Study 1A ANOVA Tables with (top) & without (bottom) Covariates**

| <i>DV = Purchase Amount</i>                         |           |           |           |          |          |
|-----------------------------------------------------|-----------|-----------|-----------|----------|----------|
| <b>Source</b>                                       | <b>SS</b> | <b>df</b> | <b>MS</b> | <b>F</b> | <b>p</b> |
| Context                                             | 43.299    | 1         | 43.299    | 15.322   | .000     |
| Gender                                              | 20.657    | 1         | 20.657    | 7.310    | .008     |
| Age                                                 | 5.912     | 1         | 5.912     | 2.092    | .151     |
| Error                                               | 313.675   | 111       | 2.826     |          |          |
| Total                                               | 3142.000  | 115       |           |          |          |
| <i>R Squared = .207 (Adjusted R Squared = .186)</i> |           |           |           |          |          |
| <b>Source</b>                                       | <b>SS</b> | <b>df</b> | <b>MS</b> | <b>F</b> | <b>p</b> |
| Context                                             | 55.568    | 1         | 55.568    | 18.470   | .000     |
| Error                                               | 339.962   | 113       | 3.009     |          |          |
| Total                                               | 3142.000  | 115       |           |          |          |
| <i>R Squared = .140 (Adjusted R Squared = .133)</i> |           |           |           |          |          |

  

| <i>DV = Amount Consumed</i>                         |           |           |           |          |          |
|-----------------------------------------------------|-----------|-----------|-----------|----------|----------|
| <b>Source</b>                                       | <b>SS</b> | <b>df</b> | <b>MS</b> | <b>F</b> | <b>p</b> |
| Context                                             | 9.112     | 1         | 9.112     | 5.517    | .021     |
| Gender                                              | 30.493    | 1         | 30.493    | 18.461   | .000     |
| Age                                                 | 5.465     | 1         | 5.465     | 3.309    | .072     |
| Error                                               | 170.127   | 103       | 1.652     |          |          |
| Total                                               | 2062.000  | 107       |           |          |          |
| <i>R Squared = .225 (Adjusted R Squared = .203)</i> |           |           |           |          |          |
| <b>Source</b>                                       | <b>SS</b> | <b>df</b> | <b>MS</b> | <b>F</b> | <b>p</b> |
| Context                                             | 13.603    | 1         | 13.603    | 6.933    | .010     |
| Error                                               | 206.005   | 105       | 1.962     |          |          |
| Total                                               | 2062.000  | 107       |           |          |          |
| <i>R Squared = .062 (Adjusted R Squared = .053)</i> |           |           |           |          |          |

  

| <i>DV = Amount Wasted</i>                           |           |           |           |          |          |
|-----------------------------------------------------|-----------|-----------|-----------|----------|----------|
| <b>Source</b>                                       | <b>SS</b> | <b>df</b> | <b>MS</b> | <b>F</b> | <b>p</b> |
| Context                                             | 12.879    | 1         | 12.879    | 5.137    | .026     |
| Gender                                              | 1.457     | 1         | 1.457     | .581     | .448     |
| Age                                                 | .307      | 1         | .307      | .122     | .727     |
| Error                                               | 258.245   | 103       | 2.507     |          |          |
| Total                                               | 328.000   | 107       |           |          |          |
| <i>R Squared = .058 (Adjusted R Squared = .030)</i> |           |           |           |          |          |
| <b>Source</b>                                       | <b>SS</b> | <b>df</b> | <b>MS</b> | <b>F</b> | <b>p</b> |
| Context                                             | 14.006    | 1         | 14.006    | 5.656    | .019     |
| Error                                               | 260.013   | 105       | 2.476     |          |          |
| Total                                               | 328.000   | 107       |           |          |          |
| <i>R Squared = .051 (Adjusted R Squared = .042)</i> |           |           |           |          |          |

Note: context = base-CC vs. personal consumption; gender (1 = male, 0 = female). The directions of significant gender effects are reported in the main text.

**Table 3: Study 1B ANOVA Tables with (top) & without (bottom) Covariates**

| <i>DV = Purchase Amount</i>                  |           |           |           |          |          |
|----------------------------------------------|-----------|-----------|-----------|----------|----------|
| <b>Source</b>                                | <b>SS</b> | <b>df</b> | <b>MS</b> | <b>F</b> | <b>p</b> |
| Context                                      | 46.906    | 1         | 46.906    | 11.485   | .001     |
| Gender                                       | .142      | 1         | .142      | .035     | .853     |
| Age                                          | .001      | 1         | .001      | .000     | .988     |
| Error                                        | 330.808   | 81        | 4.084     |          |          |
| Total                                        | 2233.000  | 85        |           |          |          |
| R Squared = .127 (Adjusted R Squared = .094) |           |           |           |          |          |
| <b>Source</b>                                | <b>SS</b> | <b>df</b> | <b>MS</b> | <b>F</b> | <b>p</b> |
| Context                                      | 47.824    | 1         | 47.824    | 11.994   | .001     |
| Error                                        | 330.953   | 83        | 3.987     |          |          |
| Total                                        | 2233.000  | 85        |           |          |          |
| R Squared = .126 (Adjusted R Squared = .116) |           |           |           |          |          |

  

| <i>DV = Amount Consumed</i>                   |           |           |           |          |          |
|-----------------------------------------------|-----------|-----------|-----------|----------|----------|
| <b>Source</b>                                 | <b>SS</b> | <b>df</b> | <b>MS</b> | <b>F</b> | <b>p</b> |
| Context                                       | 1.773     | 1         | 1.773     | .777     | .381     |
| Gender                                        | 44.316    | 1         | 44.316    | 19.429   | .000     |
| Age                                           | .742      | 1         | .742      | .325     | .570     |
| Error                                         | 184.753   | 81        | 2.281     |          |          |
| Total                                         | 1557.000  | 85        |           |          |          |
| R Squared = .219 (Adjusted R Squared = .191)  |           |           |           |          |          |
| <b>Source</b>                                 | <b>SS</b> | <b>df</b> | <b>MS</b> | <b>F</b> | <b>p</b> |
| Context                                       | 1.506     | 1         | 1.506     | .531     | .468     |
| Error                                         | 235.200   | 83        | 2.834     |          |          |
| Total                                         | 1557.000  | 85        |           |          |          |
| R Squared = .006 (Adjusted R Squared = -.006) |           |           |           |          |          |

  

| <i>DV = Amount Wasted</i>                    |           |           |           |          |          |
|----------------------------------------------|-----------|-----------|-----------|----------|----------|
| <b>Source</b>                                | <b>SS</b> | <b>df</b> | <b>MS</b> | <b>F</b> | <b>p</b> |
| Context                                      | 30.439    | 1         | 30.439    | 8.081    | .006     |
| Gender                                       | 39.445    | 1         | 39.445    | 10.471   | .002     |
| Age                                          | .796      | 1         | .796      | .211     | .647     |
| Error                                        | 305.126   | 81        | 3.767     |          |          |
| Total                                        | 428.000   | 85        |           |          |          |
| R Squared = .203 (Adjusted R Squared = .173) |           |           |           |          |          |
| <b>Source</b>                                | <b>SS</b> | <b>df</b> | <b>MS</b> | <b>F</b> | <b>p</b> |
| Context                                      | 32.357    | 1         | 32.357    | 7.664    | .007     |
| Error                                        | 350.419   | 83        | 4.222     |          |          |
| Total                                        | 428.000   | 85        |           |          |          |
| R Squared = .085 (Adjusted R Squared = .074) |           |           |           |          |          |

Note: context = base-CC vs. personal consumption; gender (1 = male, 0 = female). The directions of significant gender effects are reported in the main text.

**Table 4: Study 2 ANOVA Tables with (top) & without (bottom) Covariates**

| <i>DV = Purchase Amount</i>                         |           |           |           |          |          |
|-----------------------------------------------------|-----------|-----------|-----------|----------|----------|
| <b>Source</b>                                       | <b>SS</b> | <b>df</b> | <b>MS</b> | <b>F</b> | <b>p</b> |
| Context                                             | 5185.281  | 3         | 1728.427  | 7.944    | .000     |
| Typical                                             | 909.862   | 1         | 909.862   | 4.182    | .043     |
| Error                                               | 30024.951 | 138       | 217.572   |          |          |
| Total                                               | 71326.000 | 143       |           |          |          |
| <i>R Squared = .164 (Adjusted R Squared = .140)</i> |           |           |           |          |          |
| <b>Source</b>                                       | <b>SS</b> | <b>df</b> | <b>MS</b> | <b>F</b> | <b>p</b> |
| Context                                             | 4989.089  | 3         | 1663.030  | 7.473    | .000     |
| Error                                               | 30934.813 | 139       | 222.553   |          |          |
| Total                                               | 71326.000 | 143       |           |          |          |
| <i>R Squared = .139 (Adjusted R Squared = .120)</i> |           |           |           |          |          |

  

| <i>DV = Intended Consumption</i>                    |           |           |           |          |          |
|-----------------------------------------------------|-----------|-----------|-----------|----------|----------|
| <b>Source</b>                                       | <b>SS</b> | <b>df</b> | <b>MS</b> | <b>F</b> | <b>p</b> |
| Context                                             | 2.509     | 3         | .836      | .317     | .813     |
| Typical                                             | 225.406   | 1         | 225.406   | 85.378   | .000     |
| Error                                               | 364.334   | 138       | 2.640     |          |          |
| Total                                               | 3217.000  | 143       |           |          |          |
| <i>R Squared = .399 (Adjusted R Squared = .382)</i> |           |           |           |          |          |
| <b>Source</b>                                       | <b>SS</b> | <b>df</b> | <b>MS</b> | <b>F</b> | <b>p</b> |
| Context                                             | 16.624    | 3         | 5.541     | 1.306    | .275     |
| Error                                               | 589.740   | 139       | 4.243     |          |          |
| Total                                               | 3217.000  | 143       |           |          |          |
| <i>R Squared = .027 (Adjusted R Squared = .006)</i> |           |           |           |          |          |

Note: context = personal consumption vs. base-CC vs. CC-consumption-certain vs. CC-tastes-certain; typical = participants' typical consumption rates (covariate).

**Table 5: Study 3 ANOVA Tables with (top) & without (bottom) Covariates**

| <i>DV = Intended Consumption</i>                     |           |           |           |          |          |
|------------------------------------------------------|-----------|-----------|-----------|----------|----------|
| <b>Source</b>                                        | <b>SS</b> | <b>df</b> | <b>MS</b> | <b>F</b> | <b>p</b> |
| Context                                              | 2.684     | 1         | 2.684     | 1.567    | .212     |
| Message                                              | .146      | 1         | .146      | .085     | .771     |
| Interaction                                          | .005      | 1         | .005      | .003     | .957     |
| Typical                                              | 384.008   | 1         | 384.008   | 224.089  | .000     |
| Error                                                | 399.277   | 233       | 1.714     |          |          |
| Total                                                | 5284.000  | 238       |           |          |          |
| <i>R Squared = .496 (Adjusted R Squared = .487)</i>  |           |           |           |          |          |
| <b>Source</b>                                        | <b>SS</b> | <b>df</b> | <b>MS</b> | <b>F</b> | <b>p</b> |
| Context                                              | 6.885     | 1         | 6.885     | 2.057    | .153     |
| Message                                              | .083      | 1         | .083      | .025     | .875     |
| Interaction                                          | 1.619     | 1         | 1.619     | .484     | .487     |
| Error                                                | 783.285   | 234       | 3.347     |          |          |
| Total                                                | 5284.000  | 238       |           |          |          |
| <i>R Squared = .011 (Adjusted R Squared = -.002)</i> |           |           |           |          |          |

  

| <i>DV = Purchase Amount</i>                         |           |           |           |          |          |
|-----------------------------------------------------|-----------|-----------|-----------|----------|----------|
| <b>Source</b>                                       | <b>SS</b> | <b>df</b> | <b>MS</b> | <b>F</b> | <b>p</b> |
| Context                                             | 4343.444  | 1         | 4343.444  | 75.011   | .000     |
| Message                                             | 639.801   | 1         | 639.801   | 11.049   | .001     |
| Interaction                                         | 311.423   | 1         | 311.423   | 5.378    | .021     |
| Typical                                             | 693.624   | 1         | 693.624   | 11.979   | .001     |
| Error                                               | 13491.598 | 233       | 57.904    |          |          |
| Total                                               | 40964.000 | 238       |           |          |          |
| <i>R Squared = .314 (Adjusted R Squared = .302)</i> |           |           |           |          |          |
| <b>Source</b>                                       | <b>SS</b> | <b>df</b> | <b>MS</b> | <b>F</b> | <b>p</b> |
| Context                                             | 4530.571  | 1         | 4530.571  | 74.736   | .000     |
| Message                                             | 595.712   | 1         | 595.712   | 9.827    | .002     |
| Interaction                                         | 258.081   | 1         | 258.081   | 4.257    | .040     |
| Error                                               | 14185.222 | 234       | 60.621    |          |          |
| Total                                               | 40964.000 | 238       |           |          |          |
| <i>R Squared = .278 (Adjusted R Squared = .269)</i> |           |           |           |          |          |

Note: context = personal consumption vs. CC; message = waste vs. company; typical = participants' typical consumption rates

**Table 6: Study 4 ANOVA Tables with (top) & without (bottom) Covariates**

| <i>DV = Intended Consumption</i>                    |           |           |           |          |          |
|-----------------------------------------------------|-----------|-----------|-----------|----------|----------|
| <b>Source</b>                                       | <b>SS</b> | <b>df</b> | <b>MS</b> | <b>F</b> | <b>p</b> |
| Context                                             | 626.891   | 4         | 156.723   | 1.522    | .195     |
| Typical                                             | 405.968   | 1         | 405.968   | 3.942    | .048     |
| Error                                               | 35630.702 | 346       | 102.979   |          |          |
| Total                                               | 52324.250 | 352       |           |          |          |
| <i>R Squared = .032 (Adjusted R Squared = .018)</i> |           |           |           |          |          |
| <b>Source</b>                                       | <b>SS</b> | <b>df</b> | <b>MS</b> | <b>F</b> | <b>p</b> |
| Context                                             | 778.398   | 4         | 194.599   | 1.874    | .115     |
| Error                                               | 36036.670 | 347       | 103.852   |          |          |
| Total                                               | 52324.250 | 352       |           |          |          |
| <i>R Squared = .021 (Adjusted R Squared = .010)</i> |           |           |           |          |          |

  

| <i>DV = Purchase Amount</i>                         |            |           |           |          |          |
|-----------------------------------------------------|------------|-----------|-----------|----------|----------|
| <b>Source</b>                                       | <b>SS</b>  | <b>df</b> | <b>MS</b> | <b>F</b> | <b>p</b> |
| Context                                             | 9834.351   | 4         | 2458.588  | 15.343   | .000     |
| Typical                                             | 1894.851   | 1         | 1894.851  | 11.825   | .001     |
| Error                                               | 55441.861  | 346       | 160.237   |          |          |
| Total                                               | 143428.000 | 352       |           |          |          |
| <i>R Squared = .166 (Adjusted R Squared = .154)</i> |            |           |           |          |          |
| <b>Source</b>                                       | <b>SS</b>  | <b>df</b> | <b>MS</b> | <b>F</b> | <b>p</b> |
| Context                                             | 9154.879   | 4         | 2288.720  | 13.851   | .000     |
| Error                                               | 57336.712  | 347       | 165.235   |          |          |
| Total                                               | 143428.000 | 352       |           |          |          |
| <i>R Squared = .138 (Adjusted R Squared = .128)</i> |            |           |           |          |          |

Note: context = personal consumption vs. base-CC vs. give-CC vs. take-CC vs. give-and-take-CC; typical = participants' typical consumption rates

**Table 7: Study 5 ANOVA Tables with (top) & without (bottom) Covariates**

| <i>DV = Intended Consumption</i>                    |           |           |           |          |          |
|-----------------------------------------------------|-----------|-----------|-----------|----------|----------|
| <b>Source</b>                                       | <b>SS</b> | <b>df</b> | <b>MS</b> | <b>F</b> | <b>p</b> |
| Context                                             | 32.388    | 1         | 32.388    | 7.820    | .006     |
| Group                                               | .297      | 1         | .297      | .072     | .789     |
| Interaction                                         | 4.000     | 1         | 4.000     | .966     | .327     |
| Typical                                             | 3090.536  | 1         | 3090.536  | 746.167  | .000     |
| Error                                               | 608.857   | 147       | 4.142     |          |          |
| Total                                               | 18251.000 | 152       |           |          |          |
| <i>R Squared = .839 (Adjusted R Squared = .835)</i> |           |           |           |          |          |
| <b>Source</b>                                       | <b>SS</b> | <b>df</b> | <b>MS</b> | <b>F</b> | <b>p</b> |
| Context                                             | 7.691     | 1         | 7.691     | .308     | .580     |
| Group                                               | 46.017    | 1         | 46.017    | 1.841    | .177     |
| Interaction                                         | 25.512    | 1         | 25.512    | 1.021    | .314     |
| Error                                               | 3699.393  | 148       | 24.996    |          |          |
| Total                                               | 18251.000 | 152       |           |          |          |
| <i>R Squared = .022 (Adjusted R Squared = .002)</i> |           |           |           |          |          |

  

| <i>DV = Purchase Amount</i>                         |           |           |           |          |          |
|-----------------------------------------------------|-----------|-----------|-----------|----------|----------|
| <b>Source</b>                                       | <b>SS</b> | <b>df</b> | <b>MS</b> | <b>F</b> | <b>p</b> |
| Context                                             | 569.424   | 1         | 569.424   | 13.564   | .000     |
| Group                                               | 157.269   | 1         | 157.269   | 3.746    | .055     |
| Interaction                                         | 192.400   | 1         | 192.400   | 4.583    | .034     |
| Typical                                             | 1953.515  | 1         | 1953.515  | 46.536   | .000     |
| Error                                               | 6170.910  | 147       | 41.979    |          |          |
| Total                                               | 36615.000 | 152       |           |          |          |
| <i>R Squared = .326 (Adjusted R Squared = .308)</i> |           |           |           |          |          |
| <b>Source</b>                                       | <b>SS</b> | <b>df</b> | <b>MS</b> | <b>F</b> | <b>p</b> |
| Context                                             | 687.573   | 1         | 687.573   | 12.525   | .001     |
| Group                                               | 46.496    | 1         | 46.496    | .847     | .359     |
| Interaction                                         | 266.176   | 1         | 266.176   | 4.849    | .029     |
| Error                                               | 8124.424  | 148       | 54.895    |          |          |
| Total                                               | 36615.000 | 152       |           |          |          |
| <i>R Squared = .113 (Adjusted R Squared = .095)</i> |           |           |           |          |          |

Note: context = personal consumption vs. CC; group = 3 members vs. 10 members; typical = participants' typical consumption rates
